# Supplementary material for: The PIM family of oncoproteins: Small kinases with huge implications in myeloid leukemogenesis and as therapeutic targets
Source: PubMed Central journal article supplement (PMC4226700; doi:10.18632/oncotarget.2330), 2014-08-13
Supplement: oncotarget-05-8503-s001.pdf [file oncotarget-05-8503-s001.pdf]

# The PIM family of oncoproteins: small kinases with huge implications in myeloid leukemogenesis and as therapeutic targets

## Supplementary Material

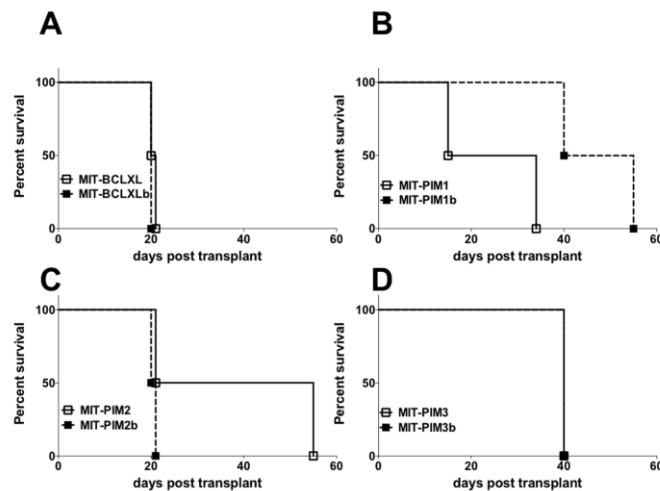

### Supplemental figure 1: Myeloid malignancies expressing MYC and PIM1, PIM2 or PIM3 are transplantable leukemias. (A) BCL-XL (B) PIM1 (C) PIM2 (D) PIM3

Single cells suspensions from spleens of primary leukemic mice were frozen in complete media containing 10% DMSO at the time of analysis. Two vials representing two independent primary leukemias were thawed from each genotype and  $2 \times 10^6$  viable cells were transplanted into the tail veins of sub-lethally irradiated FVB mice. Each leukemia was transplanted into two individual mice. Mice were monitored for disease following transplantation

|                    | <i>Survival (Days)</i> | <i>Splenocytes (% Total)</i> |            |            |                |                   | <i>Survival (Days)</i> | <i>Splenocytes (% Total)</i> |            |            |                |
|--------------------|------------------------|------------------------------|------------|------------|----------------|-------------------|------------------------|------------------------------|------------|------------|----------------|
|                    |                        | <i>GR1/<br/>Mac1</i>         | <i>CD4</i> | <i>CD8</i> | <i>CD4/CD8</i> |                   |                        | <i>GR1/<br/>Mac1</i>         | <i>CD4</i> | <i>CD8</i> | <i>CD4/CD8</i> |
| <b>BCLx1 + MYC</b> |                        |                              |            |            |                | <b>PIM3 + MYC</b> |                        |                              |            |            |                |
| TOM530             | 20                     | 42                           |            |            |                | TOM540            | 27                     | 47                           |            |            |                |
| TOM532             | 22                     | 35                           |            |            |                | TOM541            | 27                     | 53                           |            |            |                |
| TOM533             | 22                     | 65                           |            |            |                | TOM547            | 30                     | 54                           |            |            |                |
| TOM536             | 23                     | 57                           | 11         |            |                | TOM548            | 30                     | 33                           |            |            |                |
| TOM566             | 21                     | 39                           |            |            |                | TOM549            | 30                     | 64                           |            |            |                |
| TOM568             | 22                     | 32                           |            |            |                | TOM573            | 25                     | 45                           |            |            |                |
| TOM569             | 25                     | 60                           |            |            |                | TOM574            | 31                     | 46                           |            |            |                |
| TOM570             | 25                     | 68                           |            |            |                | TOM575            | 31                     | 30                           | 11         |            | 26             |
|                    |                        |                              |            |            |                | TOM579            | 38                     | 45                           |            |            |                |
|                    |                        |                              |            |            |                | TOM580            | 38                     | 20                           |            |            |                |
| <b>GFP + MYC</b>   |                        |                              |            |            |                | <b>PIM1 + MYC</b> |                        |                              |            |            |                |
| TOM556             | 64                     | 20                           | 28         |            |                | TOM428            | 23                     | 31                           |            |            |                |
| TOM558             | 67                     | 10                           | 16         |            |                | TOM431            | 26                     | 65                           |            |            |                |
| TOM559             | 67                     | 25                           |            |            |                | TOM437            | 31                     | 80                           |            |            |                |
| TOM584             | 91                     |                              |            |            |                | TOM438            | 31                     | 64                           |            |            |                |
| TOM509             | 103                    |                              |            |            |                | TOM534            | 22                     | 42                           |            |            |                |
| TOM555             | 175                    |                              |            |            |                | TOM535            | 22                     | 45                           |            |            |                |
|                    |                        |                              |            |            |                | TOM537            | 23                     | 28                           |            |            |                |
| <b>PIM2 + MYC</b>  |                        |                              |            |            |                | TOM538            | 23                     | 25                           |            |            |                |
| TOM543             | 35                     | 76                           |            |            |                | TOM539            | 23                     | 33                           |            |            |                |
| TOM544             | 35                     | 26                           |            | 16         |                | TOM567            | 21                     | 24                           |            |            |                |
| TOM545             | 40                     | 31                           |            |            |                | TOM571            | 25                     | 30                           |            |            |                |
| TOM550             | 44                     | 47                           | 15         |            |                | TOM572            | 25                     | 48                           |            |            |                |
| TOM581             | 38                     | 41                           | 15         |            |                |                   |                        |                              |            |            |                |
| TOM582             | 38                     | 26                           | 32         |            |                |                   |                        |                              |            |            |                |
| TOM585             | 42                     | 16                           | 20         |            |                |                   |                        |                              |            |            |                |
| TOM586             | 42                     | 50                           | 11         |            |                |                   |                        |                              |            |            |                |
| TOM587             | 42                     | 16                           | 37         |            |                |                   |                        |                              |            |            |                |
| TOM588             | 42                     | 32                           |            |            |                |                   |                        |                              |            |            |                |

**Supplemental Figure 2:** Table showing percentages of hematopoietic lineages from the spleens of leukemic mice.
